# Supplementary material for: Highly efficient MOF-based self-propelled micromotors for water purification
Source: Royal Society of Chemistry journal article supplement (doi:10.1039/c7ra08127h), 2017-01-01

**Supplementary data:**

**Highly Efficient MOFs-based self-propelled micromotors for water purification**

Ruiqin Wang, Weilin Guo\*, Xianghui Li, Zhonghua Liu, Hua Liu, Shiyang Ding  
School of Resources and Environment, University of Jinan, Jinan 250022, China

\*Corresponding author. Tel/fax: +86 531 8276 9233.

E-mail address: chm\_guowl@ujn.edu.cn (W. L. Guo).

1. Supporting Video

Video 1 Propulsion of Ag-ZIF micromotor in the presence of 6% H<sub>2</sub>O<sub>2</sub> and 0.2% sodium cholate solution.

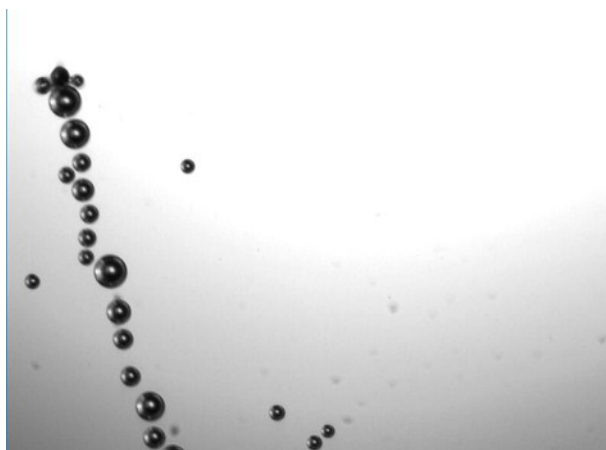

Supplement: c7ra08127h2.pdf [file c7ra08127h2.pdf]
